# Supplementary material
Source: PubMed Central journal article supplement (PMC6166784)
Supplement: NIHMS78712-supplement-Supplementary_Information.pdf [file NIHMS78712-supplement-Supplementary_Information.pdf]

1 **Microbial temperature sensitivity and biomass change explain soil**  
2 **carbon loss with warming**

3

4 Tom W. N. Walker, Christina Kaiser, Florian Strasser, Craig W. Herbold, Niki I.  
5 W. Leblans, Dagmar Wuebken, Ivan A. Janssens, Bjarni D. Sigurdsson and  
6 Andreas Richter

7

8

9

**SUPPLEMENTARY INFORMATION**

10

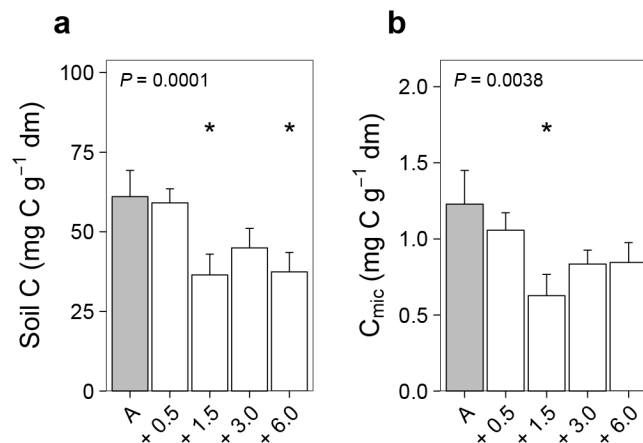

11

12 **Supplementary Fig. S1. Soil carbon pool responses to long-term warming.** Mean ( $\pm$  SE; n = 5) (a) soil carbon  
13 content (mg C g<sup>-1</sup> soil dry mass); and (b) microbial biomass C (C<sub>mic</sub>; mg C g<sup>-1</sup> soil dry mass) of soils following exposure to  
14 at least 50 years of ambient temperature (A; grey bars) or warming of between 0.5 °C and 6 °C (white bars). Asterisks  
15 indicate significant differences between ambient and warmed temperatures.

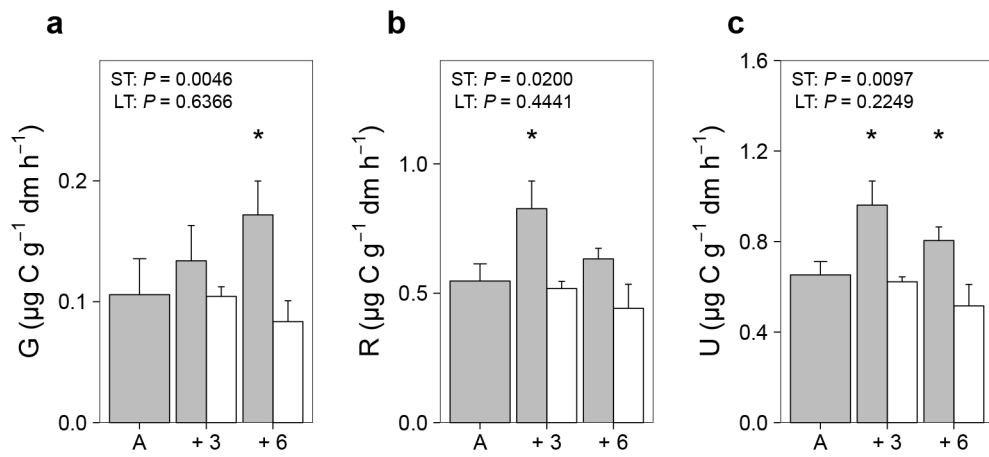

16

17

**Supplementary Fig. S2. Soil microbial responses to laboratory warming.** Mean ( $\pm$  SE;  $n = 5$ ) (a) total microbial

18

growth (G;  $\mu\text{g C g}^{-1}$  soil dry mass  $\text{h}^{-1}$ ); (b) total microbial respiration (R;  $\mu\text{g C g}^{-1}$  soil dry mass  $\text{h}^{-1}$ ); and (c) total microbial

19

C uptake (U;  $\mu\text{g C g}^{-1}$  soil dry mass  $\text{h}^{-1}$ ) of soils from ambient (A; grey bars), + 3 °C or + 6 °C (white bars) field

20

temperature following six weeks of incubation at ambient temperature (11 °C), + 3 °C and + 6 °C.  $P$ -values show

21

significance of warming effects on ambient field soils only (ST; i.e. short-term warming) and ambient versus warmed field

22

soils (LT: i.e. long-term warming), with asterisks indicating significant differences ( $P < 0.05$ ) between ambient and

23

warmed temperatures.

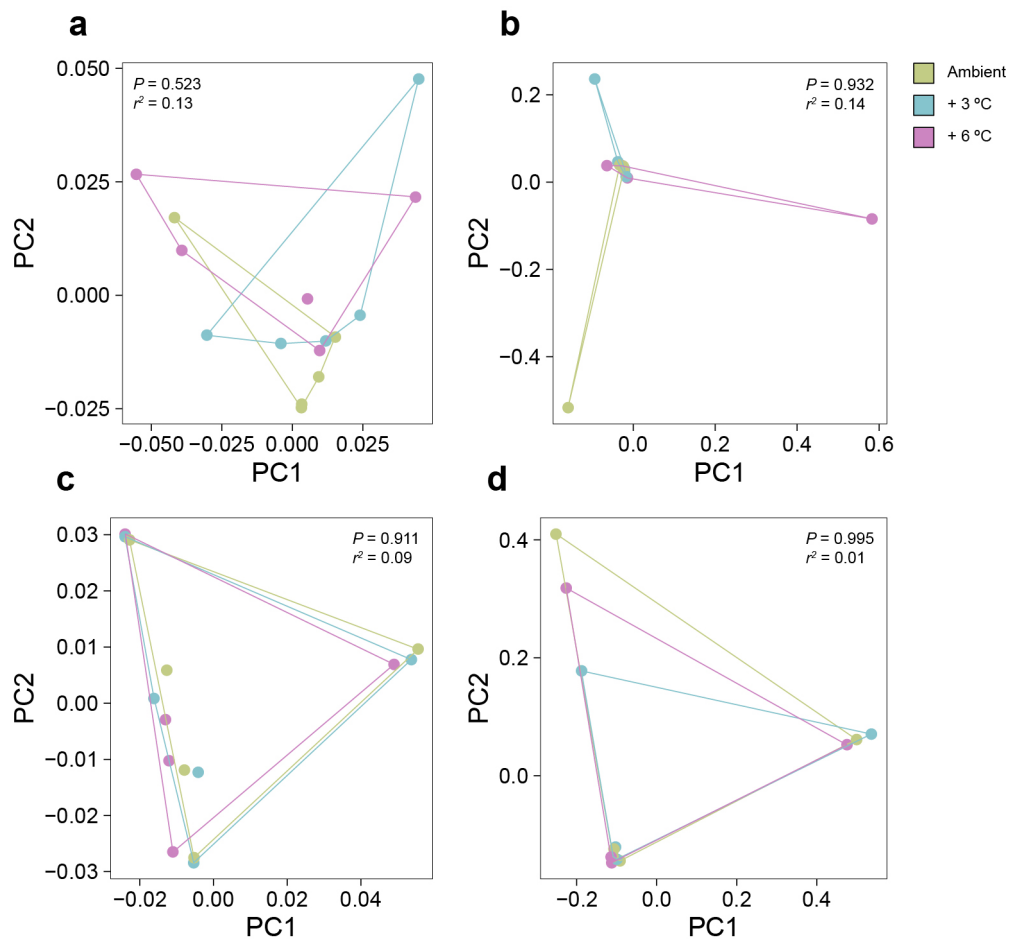

24

25 **Supplementary Fig. S3. Long-term and short-term warming effects on soil microbial community composition.**

26 PCA plots showing the distribution of (a,c) bacterial/archaeal and (b,d) fungal OTUs across principal components (PCs)  
 27 1 and 2 for soils subjected to either (a,b) 50 years or (b,d) six-weeks of ambient temperature (A; green) or warming of 3  
 28 °C (blue) and 6 °C (purple).  $P$ -values illustrate the significance of differences between temperatures as determined by  
 29 PERMANOVAs (Methods). Visual similarities between distributions illustrated in (c,d) emerged because transect identity,  
 30 not incubation temperature, drove most variation observed between bacterial/archaeal ( $r^2 = 0.64$ ,  $P = 0.001$ ) and fungal  
 31 ( $r^2 = 0.60$ ,  $P = 0.017$ ) OTUs.

a

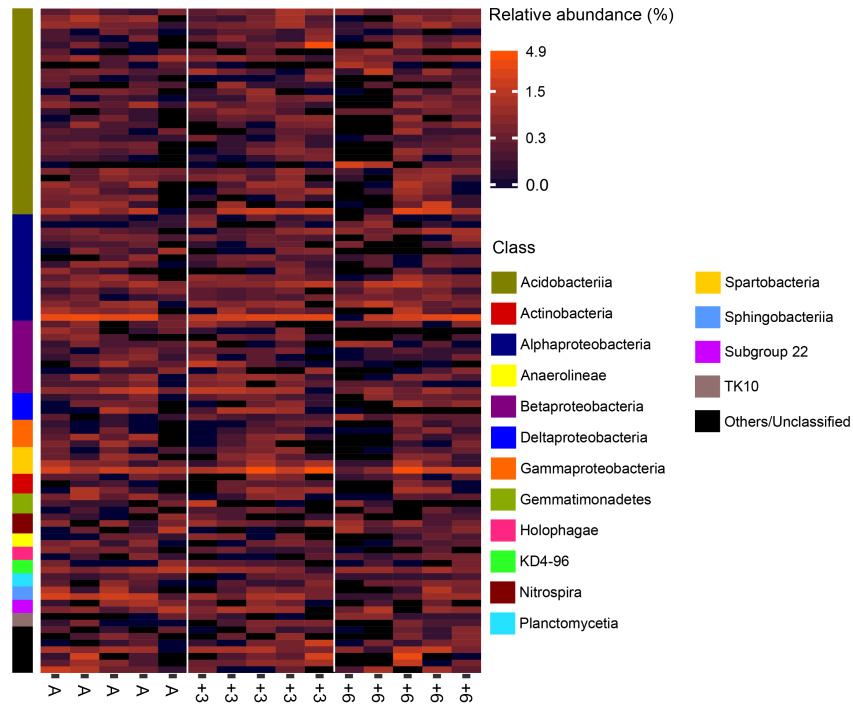

b

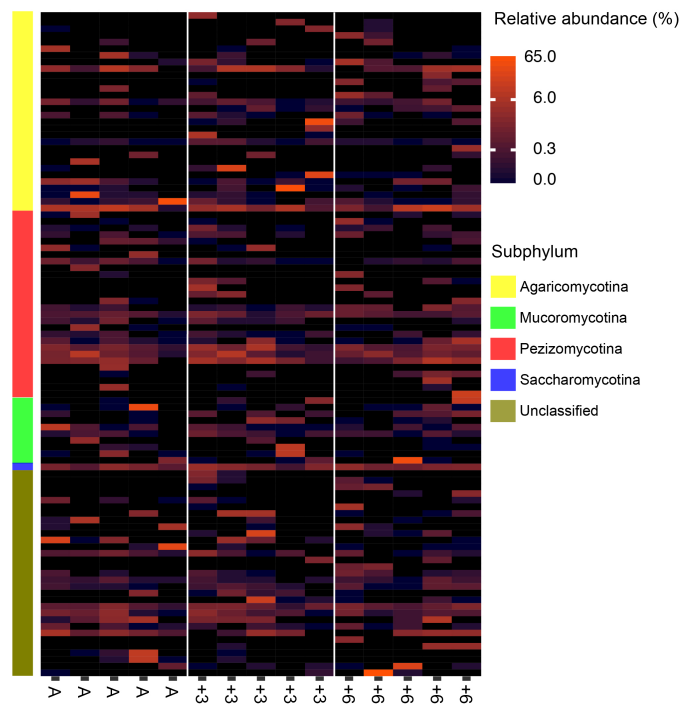

32

33

34

35

36

37

38

39

**Supplementary Fig. S4. The relative abundance of microbial taxa under long-term warming, showing no**

**consistent changes in microbial community structure with temperature.** Heatmaps illustrating the relative

abundance (%) of the 100 most abundant (a) bacterial and (b) fungal OTUs in soils exposed to more than 50 years of

warming (A: ambient, + 3 °C, + 6 °C). OTUs (rows) are clustered by class for bacteria/archaea and by subphylum for

fungi, and data are shown for all plots separately (columns) clustered by field temperature, with numbers representing

different replicate blocks.

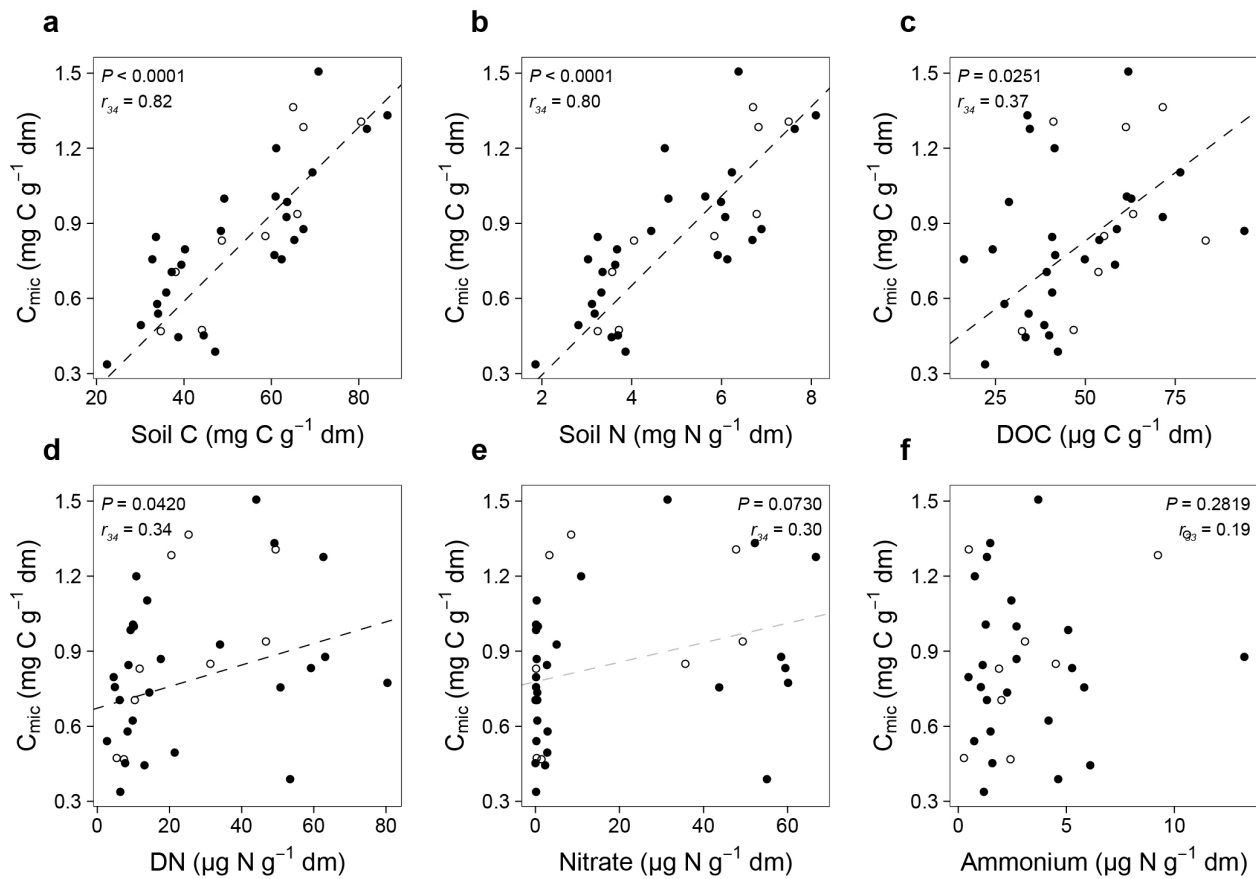

40

41

42

43

44

45

46

47

48

**Supplementary Fig. S5. Associations between microbial biomass and soil carbon and nitrogen pools.** Microbial biomass C ( $C_{mic}$ ;  $\text{mg C g}^{-1}$  soil dry mass) against (a) soil carbon content ( $\text{mg C g}^{-1}$  soil dry mass), (b) soil nitrogen content ( $\text{mg N g}^{-1}$  soil dry mass), (c) dissolved organic carbon (DOC;  $\mu\text{g C g}^{-1}$  soil dry mass), (d) dissolved nitrogen (DN;  $\mu\text{g N g}^{-1}$  soil dry mass), (e) nitrate nitrogen ( $\mu\text{g N g}^{-1}$  soil dry mass), and (f) ammonium nitrogen ( $\mu\text{g N g}^{-1}$  soil dry mass). Pearson correlations were performed on field and incubation data irrespective of warming intensity (warmed: black points, ambient: white points), with black lines showing significant ( $P < 0.05$ ) correlations and grey lines showing marginally significant ( $P < 0.1$ ) correlations.

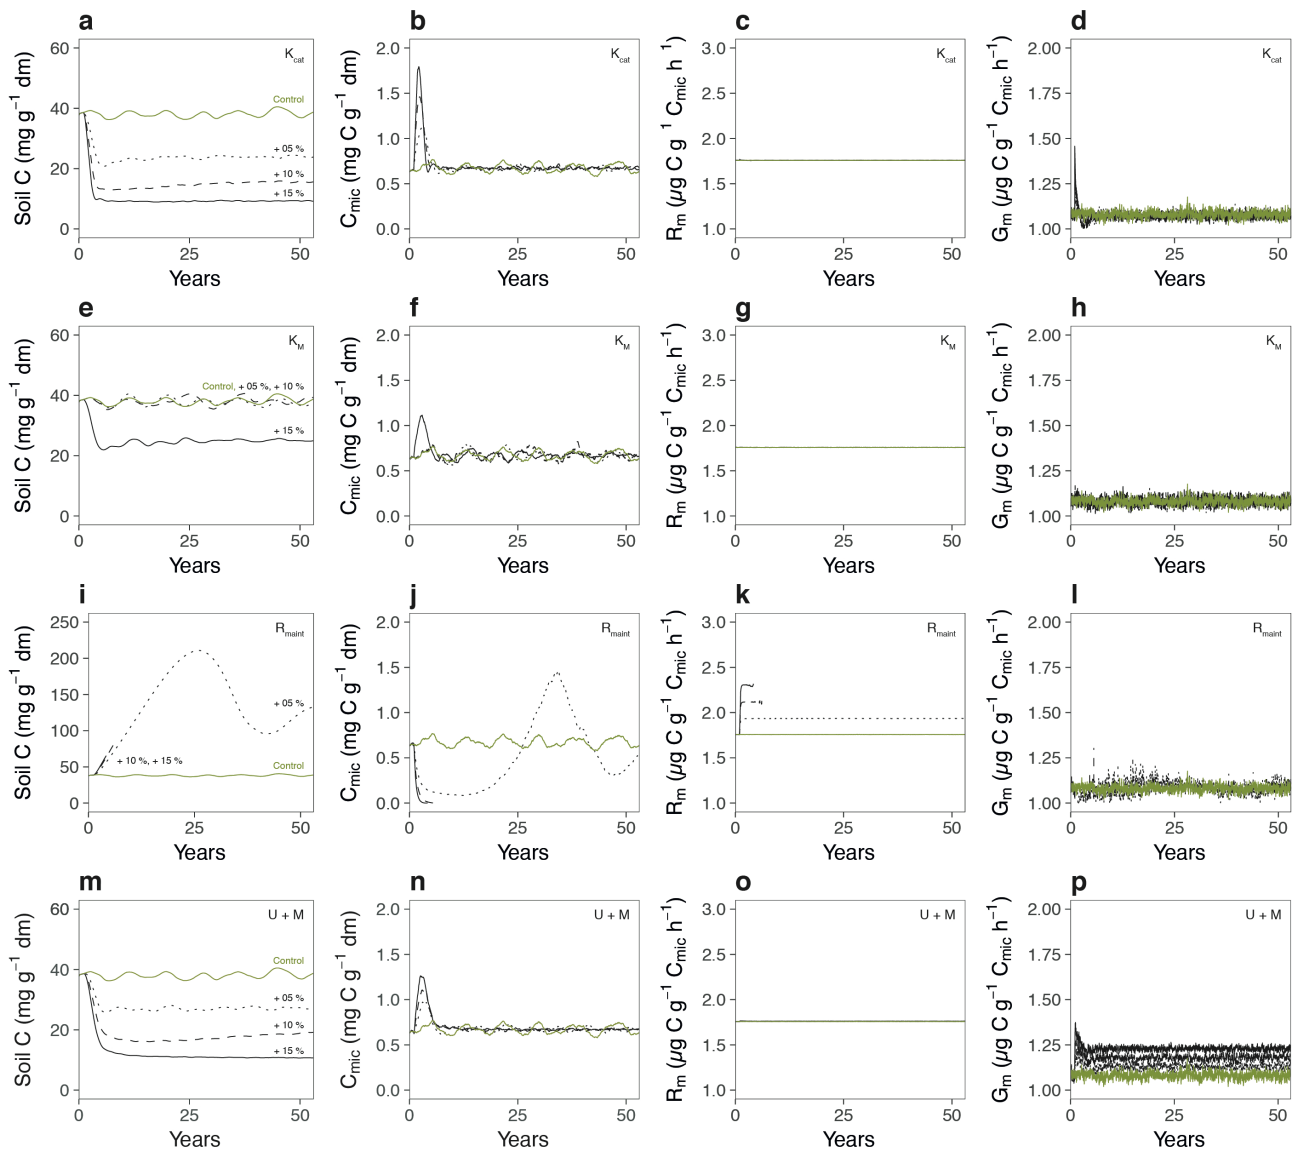

49

50

51 **Supplementary Fig. S6. Simulated responses to microbial physiology.** Mean ( $n = 3$ ) modelled responses of (a,e,l,m)

52 soil carbon content ( $\text{mg g}^{-1}$  soil dry mass), (b,f,j,n) microbial biomass C ( $C_{mic}$ ;  $\text{mg C g}^{-1}$  soil dry mass), (c,g,k,o) mass-

53 specific microbial respiration ( $R$ ;  $\mu\text{g C g}^{-1} C_{mic} \text{h}^{-1}$ ) and (d,h,l,p) mass-specific microbial growth ( $G_m$ ;  $\mu\text{g C g}^{-1} C_{mic} \text{h}^{-1}$ ) to

54 50 years of accelerated microbial physiology (black lines) or a control scenario (green lines). We modelled 5 % (dotted

55 line), 10 % (dashed line) and 15 % (solid line) increases in (a-d) extracellular enzyme efficiency ( $K_{cat}$ ), (e-h) extracellular

56 enzyme substrate affinity ( $K_M$ ), (i-l) maintenance respiration ( $R_{maint}$ ) or (m-p) maximum uptake and mortality ( $U+M$ ). For (i-

57 l), increases of more than 5 % caused a collapse of microbial biomass within 5 years.

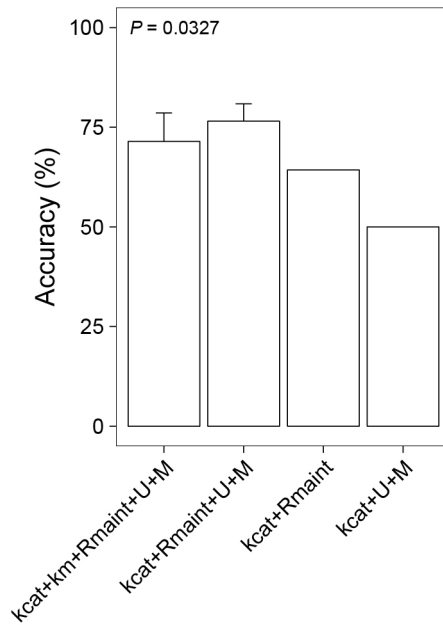

58

59 **Supplementary Fig. S7. Accuracy of multiple parameter model scenarios.** Mean accuracy ( $\% \pm \text{SE}$ ) of model  
60 scenarios involving combinations of extracellular enzyme efficiency ( $k_{cat}$ ,  $k_M$ ), maintenance respiration ( $R_{\text{maint}}$ ), maximal  
61 uptake (U) and mortality (M). Accuracy was calculated as the percentage of output parameters matching the direction of  
62 equivalent empirical responses to warming on both short-term (i.e. six weeks) and long-term (i.e. at least 50 years)  
63 timescales (Methods).  $P$ -value indicates significance ( $P < 0.05$ ) of differences between scenarios.

64

65

66 **Table S1. Comparison of key carbon and nitrogen pools and fluxes between the model at steady state and**  
67 **observations from ambient temperature field plots.**

68

| Flux, pool or factor                    | Unit                                                         | Model at steady-state* | Ambient soil** |
|-----------------------------------------|--------------------------------------------------------------|------------------------|----------------|
| Soil C                                  | mg C g <sup>-1</sup> soil                                    | 37.45 (0.573)          | 61.04 (18.470) |
| Soil C:N                                | Ratio                                                        | 17.55 (0.122)          | 10.56 (0.923)  |
| Microbial biomass C                     | mg C g <sup>-1</sup> soil                                    | 0.654 (0.032)          | 1.228 (0.496)  |
| Microbial C per soil C                  | mg microbial C mg <sup>-1</sup> soil C                       | 0.017 (0.001)          | 0.020 (0.002)  |
| Heterotrophic respiration               | µg C g <sup>-1</sup> soil hour <sup>-1</sup>                 | 1.149 (0.029)          | 1.062 (0.396)  |
| Biomass-specific respiration            | µg C mg <sup>-1</sup> microbial biomass C hour <sup>-1</sup> | 1.758 (0.000)          | 0.898 (0.212)  |
| Microbial growth                        | µg C g <sup>-1</sup> soil hour <sup>-1</sup>                 | 0.707 (0.017)          | 0.341 (0.117)  |
| Turnover rate (biomass-specific growth) | fraction of microbial biomass day <sup>-1</sup>              | 0.026 (0.000)          | 0.007 (0.001)  |
| Carbon use efficiency                   |                                                              | 0.381 (0.001)          | 0.244 (0.028)  |

69 \*Simulated: means ( $\pm$  SD) of carbon pools and fluxes (averaged over a 1.5 year period) of three replicate control model  
70 scenarios. Values were aggregated over the grid volume and calculated on a per gram soil basis assuming a bulk  
71 density of 0.73 g dry soil cm<sup>-3</sup> (data not shown).

72 \*\*Measured.

73

74

75

76

**Table S2. Parameter settings used for the spin-up runs and control scenario.** Parameters in bold/italic were altered

77

for “warmed” scenarios as described in Table S3.

| Parameter                                                       | Description                                                                                  | Unit                                            | Value                  |
|-----------------------------------------------------------------|----------------------------------------------------------------------------------------------|-------------------------------------------------|------------------------|
| <u>Enzyme kinetics<sup>†</sup></u>                              |                                                                                              |                                                 |                        |
| <i><b><math>k_{cat\_PS}</math></b></i>                          | catalytic efficiency (kcat) of enzymes degrading primary substrate (plant material)          | fmol C enzyme <sup>-1</sup> hour <sup>-1</sup>  | 1.722                  |
| <i><b><math>k_{cat\_CMR}</math></b></i>                         | kcat of enzymes degrading C-rich microbial remains                                           | fmol C enzyme <sup>-1</sup> hour <sup>-1</sup>  | 1.722                  |
| <i><b><math>k_{cat\_NMR}</math></b></i>                         | kcat of enzymes degrading N-rich microbial remains                                           | fmol C enzyme <sup>-1</sup> hour <sup>-1</sup>  | 1.890                  |
| <i><b><math>K_M\_PS</math></b></i>                              | $K_M$ (substrate concentration at which reaction rate is half-maximal) of primary substrate  | nmol C mm <sup>-3</sup>                         | 8                      |
| <i><b><math>K_M\_CMR</math></b></i>                             | $K_M$ C-rich microbial remains                                                               | nmol C mm <sup>-3</sup>                         | 8                      |
| <i><b><math>K_M\_NMR</math></b></i>                             | $K_M$ N-rich microbial remains                                                               | nmol C mm <sup>-3</sup>                         | 8                      |
| $k_{enz}$                                                       | First order rate constant for inactivation of enzymes                                        | hour <sup>-1</sup>                              | 0.0009375              |
| <u>Microbial physiology<sup>‡</sup></u>                         |                                                                                              |                                                 |                        |
| <i><b><math>R_{maint}</math></b></i>                            | Maintenance respiration                                                                      | Fraction of biomass hour <sup>-1</sup>          | 0.001725               |
| $R_{ge}$                                                        | Respiration for growth and enzyme production                                                 | Fraction of C used for growth/enzyme production | 0.030000               |
| <i><b><math>U_{max}</math></b></i>                              | Basic maximum uptake rate (to be multiplied with individual surface:volume ratio)            | Fraction of biomass hour <sup>-1</sup>          | 0.001159               |
| <i><b><math>M</math></b></i>                                    | Mortality rate                                                                               | Probability to die hour <sup>-1</sup>           | 0.00106875             |
| $E_{fr}^{\text{E}}$                                             | Fraction of C uptake used for enzyme production (after deduction of maintenance respiration) |                                                 | 0.00156250             |
| <u>Maximum cell size and colony density<sup>‡</sup></u>         |                                                                                              |                                                 |                        |
| $C_{max}$                                                       | Size at which a microbial cell divides and colonizes a neighbouring microsite                | fmol C cell <sup>-1</sup>                       | 4                      |
| $C_{min}$                                                       | Lower cell limit (below it, cells die from starving)                                         | fmol C cell <sup>-1</sup>                       | 0.4                    |
| $C_{col}$                                                       | Maximal density of microbial cells in each microsite                                         | Cells $\mu\text{m}^{-1}$                        | 0.032                  |
| <u>Microbial cell composition and stoichiometry<sup>‡</sup></u> |                                                                                              |                                                 |                        |
| $F_{DOM}$                                                       | Cell solubles                                                                                | Fraction of biomass                             | 0.06                   |
| $F_{CC}$                                                        | C-rich complex compounds (f.e. cell wall compounds, lipids, starch)                          | Fraction of biomass                             | 0.52                   |
| $F_{NC}$                                                        | N-rich complex compounds (proteins, DNA, RNA)                                                | Fraction of biomass                             | 0.42                   |
| $M_{cn}^{\text{B}}$                                             | C/N ratio of microbial cells                                                                 | Ratio                                           | 9.03                   |
| <u>Initial values (for the spin-up)</u>                         |                                                                                              |                                                 |                        |
| $C_{enz}$                                                       | Extracellular enzymes                                                                        | nmol C mm <sup>-3</sup>                         | 4                      |
| $C_{CMR}$                                                       | C-rich microbial remains                                                                     | nmol C mm <sup>-3</sup>                         | 400                    |
| $C_{NMR}$                                                       | N-rich microbial remains                                                                     | nmol C mm <sup>-3</sup>                         | 80                     |
| $C_{DOM}^*$                                                     | Bioavailable dissolved organic matter                                                        | nmol C mm <sup>-3</sup>                         | 56                     |
| $C_{PS}$                                                        | Primary substrate (plant material)                                                           | nmol C mm <sup>-3</sup>                         | 16000                  |
| <u>Continuous input of organic matter</u>                       |                                                                                              |                                                 |                        |
| $I_{PS}$                                                        | Input of plant-derived organic matter                                                        | nmol C mm <sup>-3</sup> hour <sup>-1</sup>      | 0.072                  |
| $CN_{PS}$                                                       | C/N ratio of $PS_{input}$                                                                    |                                                 | 40                     |
| <u>Translocation of solubles</u>                                |                                                                                              |                                                 |                        |
| $D_0$                                                           | Diffusion rate of soluble organic compounds <sup>‡</sup>                                     | cm <sup>2</sup> sec <sup>-1</sup>               | 7.5 x 10 <sup>-9</sup> |
| $F_L$                                                           | Fraction of diffusing soluble compounds that is lost by leaching                             |                                                 | 0.000375               |
| $W$                                                             | Water level                                                                                  | $\mu\text{m}^3 \mu\text{m}^{-3}$                | 0.18                   |
| <u>Model dimensions</u>                                         |                                                                                              |                                                 |                        |
| $L_{MS}$                                                        | Microsite length                                                                             | $\mu\text{m}$                                   | 5                      |
| $L_G$                                                           | Soil grid length                                                                             | Microsites                                      | 200                    |
| $L_{TS}$                                                        | Time step length                                                                             | min                                             | 30                     |

78

<sup>†</sup>Within the range reported<sup>1,2</sup>

79

<sup>‡</sup> Maintenance respiration and maximum uptake rates derived from ranges of specific maintenance rates and maximum relative growth rates<sup>3</sup>

80

81

<sup>‡</sup> Refs<sup>4-7</sup>

82

<sup>E</sup>Ratio of enzyme production is 0.64:0.18:0.18 for plant-derived organic matter: C-rich microbial remains: N-rich microbial remains degrading enzymes

83

84

<sup>‡</sup>



85 <sup>β</sup>Microbial C/N ratio is calculated from the chemical composition of the total biomass, assuming that  $F_{\text{dom}}$ ,  $F_{\text{CC}}$  and  $F_{\text{NC}}$   
86 have C:N ratios of 15, 150 and 5, respectively<sup>9</sup>

87 \* $C_{\text{DOM}}$  has an initial C/N ratio of 8.

88 <sup>γ</sup> Effective diffusion rate is calculated by multiplying the basic diffusion rate ( $D_0$ ) with an impedance factor that is related  
89 to the water level ( $IF = 0.67 \times W - 0.102$ , where  $IF$  is the impedance factor and  $W$  is the volumetric water content in  
90  $\mu\text{m}/\mu\text{m}$ . Adapted from ref. <sup>10</sup> based on a bulk density of 0.73). The distance a particle can travel per time step in a  
91 random walk ("jumpsize") is then calculated based on the effective diffusion rate ( $\sim 10 \mu\text{m}$ , which corresponds to 2  
92 microsites in this model). For details see ref. <sup>11</sup>.

93

94

95

96 **Table S3 (overleaf). Short-term and long-term responses of modelled pools and fluxes to sudden changes in**  
97 **microbial and biochemical parameters that accompany rising soil temperatures.** Scenarios considered singular  
98 and combined increases to enzyme kinetics ( $k_{\text{cat}}$ ,  $k_M$ ) and/or microbial activity (maintenance respiration ( $R_{\text{maint}}$ ), maximum  
99 microbial uptake ( $U_{\text{max}}$ ), and microbial mortality). All scenarios started from the same spin-up run (see Supplementary  
100 Tables S1 and S2 for spin-up parameter settings and resulting steady state conditions, respectively). Parameter changes  
101 induced in scenarios are expressed as fractions of spin-up (i.e. control) parameters (e.g. 0.05 represents a 5 % increase  
102 relative the control value shown in Supplementary Table S1). The control scenario was allowed to run without constraint  
103 from the spin-up with no induced parameter changes. Responses are presented as proportional differences between  
104 each scenario and the control scenario within the same time period (i.e. -0.05 represents a 5 % decrease). Model  
105 outputs were aggregated over the whole grid and means ( $\pm$  SE,  $n = 3$ ) were taken for three time periods: (i) 40 to 50  
106 days (approx. six weeks; short-term response); (ii) 1.5 to 3 years (peak short-term response); and (iii) 49.5 to 50.5 years  
107 (long-term response) (Methods). Soil C: total carbon stock ( $\text{mg C g}^{-1}$  soil); C/N: soil carbon to nitrogen ratio;  $C_{\text{mic}}$ :  
108 microbial biomass carbon ( $\text{mg C g}^{-1}$  soil); DOC: dissolved organic carbon ( $\mu\text{g C g}^{-1}$  soil); CUE: community carbon use  
109 efficiency, calculated as  $\text{CUE} = (U_{\text{DOC}} - R_{\text{ENZ}}) / U_{\text{DOC}}$ , where  $U_{\text{DOC}}$  is total amount of DOC taken up by all microbes on the  
110 grid,  $R$  is the total amount of carbon respired and  $P_{\text{ENZ}}$  is the total amount of carbon released as extracellular enzymes;  
111  $R$ : total microbial respiration ( $\mu\text{g C g}^{-1}$  soil  $\text{h}^{-1}$ );  $G$ : total microbial growth ( $\mu\text{g C g}^{-1}$  soil  $\text{h}^{-1}$ );  $R_{\text{mic}}$ : mass-specific microbial  
112 respiration ( $\text{mg C g } C_{\text{mic}}^{-1} \text{ h}^{-1}$ );  $G_{\text{mic}}$ : mass-specific microbial growth (fraction of  $C_{\text{mic}} \text{ day}^{-1}$ ). Coloured bars visualize relative  
113 changes within each time period (blue: positive change, orange: negative change), scaled for each response separately.

|                      |                  | Parameter change<br>(fraction of control) |                    |                  |      |        |        | Short-term response (40-50 days after change)<br>(relative difference to control as fraction of the control scenario) |        |       |        |       |        |       |        |       |        |       |        |                  |        |                  |        |                  |        |       |        |
|----------------------|------------------|-------------------------------------------|--------------------|------------------|------|--------|--------|-----------------------------------------------------------------------------------------------------------------------|--------|-------|--------|-------|--------|-------|--------|-------|--------|-------|--------|------------------|--------|------------------|--------|------------------|--------|-------|--------|
| Scena<br>rio #       | K <sub>cat</sub> | K <sub>m</sub>                            | R <sub>maint</sub> | U <sub>max</sub> | M    | Soil C |        | C/N                                                                                                                   |        | Cmic  |        | DOC   |        | CUE   |        | R     |        | G     |        | R <sub>sub</sub> |        | R <sub>mic</sub> |        | G <sub>mic</sub> |        |       |        |
|                      |                  |                                           |                    |                  |      | aver.  | stderr | aver.                                                                                                                 | stderr | aver. | stderr | aver. | stderr | aver. | stderr | aver. | stderr | aver. | stderr | aver.            | stderr | aver.            | stderr | aver.            | stderr | aver. | stderr |
| Contr.               | 0                |                                           |                    |                  |      | 0.00   | 0.00   | 0.00                                                                                                                  | 0.00   | 0.00  | 0.02   | 0.00  | 0.01   | 0.00  | 0.00   | 0.00  | 0.02   | 0.00  | 0.02   | 0.00             | 0.02   | 0.00             | 0.00   | 0.00             | 0.00   | 0.01  |        |
| Enzyme kinetics      | 1                | 0.05                                      |                    |                  |      | 0.00   | 0.00   | 0.00                                                                                                                  | 0.00   | 0.11  | 0.01   | 0.01  | 0.01   | 0.05  | 0.01   | 0.12  | 0.01   | 0.11  | 0.00   | 0.10             | 0.02   | 0.01             | 0.00   | 0.00             | 0.00   | 0.09  | 0.01   |
|                      | 2                | 0.10                                      |                    |                  |      | -0.01  | 0.00   | -0.01                                                                                                                 | 0.00   | 0.26  | 0.01   | -0.01 | 0.02   | 0.10  | 0.01   | 0.27  | 0.01   | 0.49  | 0.02   | 0.27             | 0.01   | 0.00             | 0.00   | 0.00             | 0.18   | 0.01  |        |
|                      | 3                | 0.15                                      |                    |                  |      | -0.01  | 0.00   | -0.01                                                                                                                 | 0.00   | 0.37  | 0.01   | 0.00  | 0.02   | 0.13  | 0.00   | 0.38  | 0.01   | 0.70  | 0.02   | 0.39             | 0.02   | 0.00             | 0.00   | 0.00             | 0.24   | 0.00  |        |
|                      | 4                |                                           | 0.05               |                  |      | 0.00   | 0.00   | 0.00                                                                                                                  | 0.00   | 0.00  | 0.00   | 0.01  | 0.01   | 0.00  | 0.00   | 0.00  | 0.01   | 0.01  | 0.01   | 0.01             | 0.01   | 0.01             | 0.00   | 0.00             | 0.00   | 0.01  | 0.01   |
|                      | 5                |                                           | 0.10               |                  |      | 0.00   | 0.00   | 0.00                                                                                                                  | 0.00   | 0.07  | 0.05   | 0.01  | 0.00   | 0.04  | 0.02   | 0.07  | 0.05   | 0.14  | 0.08   | 0.08             | 0.05   | 0.00             | 0.00   | 0.00             | 0.00   | 0.06  | 0.03   |
|                      | 6                |                                           | 0.15               |                  |      | 0.00   | 0.00   | 0.00                                                                                                                  | 0.00   | -0.03 | 0.01   | 0.00  | 0.00   | 0.00  | 0.01   | -0.03 | 0.01   | -0.02 | 0.03   | -0.02            | 0.03   | -0.03            | 0.01   | 0.00             | 0.00   | 0.00  | 0.02   |
|                      | 7                |                                           | 1.00               |                  |      | 0.00   | 0.00   | 0.00                                                                                                                  | 0.00   | -0.08 | 0.00   | 0.01  | 0.01   | -0.01 | 0.00   | -0.09 | 0.00   | -0.10 | 0.01   | -0.09            | 0.01   | -0.09            | 0.01   | 0.00             | 0.00   | -0.01 | 0.00   |
| Microbial physiology | 8                |                                           | 0.05               |                  |      | 0.00   | 0.00   | 0.00                                                                                                                  | 0.00   | -0.05 | 0.01   | 0.02  | 0.00   | -0.09 | 0.01   | 0.01  | 0.00   | -0.13 | 0.02   | 0.01             | 0.01   | 0.00             | 0.00   | 0.00             | 0.16   | 0.00  |        |
|                      | 9                |                                           | 0.10               |                  |      | 0.00   | 0.00   | 0.00                                                                                                                  | 0.00   | -0.14 | 0.01   | 0.06  | 0.01   | -0.16 | 0.01   | -0.03 | 0.01   | -0.25 | 0.00   | -0.03            | 0.02   | 0.13             | 0.00   | 0.00             | -0.13  | 0.01  |        |
|                      | 10               |                                           | 0.15               |                  |      | 0.00   | 0.00   | 0.00                                                                                                                  | 0.00   | -0.16 | 0.02   | 0.05  | 0.01   | -0.26 | 0.00   | 0.00  | 0.02   | -0.36 | 0.02   | 0.00             | 0.02   | 0.19             | 0.00   | 0.00             | -0.24  | 0.01  |        |
|                      | 11               |                                           |                    | 0.05             | 0.05 |        | 0.00   | 0.00                                                                                                                  | 0.00   | 0.00  | -0.02  | 0.01  | 0.03   | 0.01  | 0.06   | 0.00  | -0.01  | 0.01  | 0.08   | 0.01             | -0.01  | 0.02             | 0.00   | 0.00             | 0.00   | 0.10  | 0.01   |
|                      | 12               |                                           |                    | 0.10             | 0.10 |        | 0.00   | 0.00                                                                                                                  | 0.00   | 0.00  | 0.02   | 0.06  | 0.01   | 0.09  | 0.01   | 0.00  | 0.02   | 0.16  | 0.03   | 0.00             | 0.02   | 0.00             | 0.00   | 0.00             | 0.00   | 0.16  | 0.01   |
|                      | 13               |                                           |                    | 0.15             | 0.15 |        | 0.00   | 0.00                                                                                                                  | 0.00   | 0.00  | -0.01  | 0.00  | 0.07   | 0.02  | 0.14   | 0.01  | 0.00   | 0.00  | 0.24   | 0.01             | 0.00   | 0.00             | 0.00   | 0.00             | 0.00   | 0.24  | 0.01   |
|                      | 14               | 0.10                                      |                    | 0.05             |      |        | 0.00   | 0.00                                                                                                                  | 0.00   | 0.00  | 0.16   | 0.01  | 0.02   | 0.01  | 0.01   | 0.01  | 0.24   | 0.01  | 0.26   | 0.01             | 0.25   | 0.02             | 0.17   | 0.00             | 0.00   | 0.08  | 0.01   |
| Mixed Scenarios      | 15               | 0.15                                      |                    | 0.10             |      | -0.01  | 0.00   | -0.01                                                                                                                 | 0.00   | 0.20  | 0.02   | 0.06  | 0.01   | -0.04 | 0.00   | 0.26  | 0.02   | 0.28  | 0.02   | 0.27             | 0.02   | 0.13             | 0.00   | 0.00             | 0.07   | 0.00  |        |
|                      | 16               | 0.10                                      |                    |                  | 0.05 | 0.05   | 0.00   | 0.00                                                                                                                  | -0.01  | 0.00  | 0.24   | 0.01  | 0.03   | 0.00  | 0.14   | 0.00  | 0.25   | 0.01  | 0.55   | 0.01             | 0.25   | 0.01             | 0.00   | 0.00             | 0.25   | 0.00  |        |
|                      | 17               | 0.15                                      |                    | 0.10             | 0.10 |        | 0.00   | 0.00                                                                                                                  | -0.01  | 0.00  | 0.38   | 0.02  | 0.04   | 0.02  | 0.20   | 0.00  | 0.39   | 0.02  | 0.30   | 0.02             | 0.00   | 0.02             | 0.01   | 0.00             | 0.37   | 0.01  |        |
|                      | 18               | 0.10                                      |                    | 0.05             | 0.05 | 0.05   | 0.00   | 0.00                                                                                                                  | 0.00   | 0.00  | 0.16   | 0.01  | 0.06   | 0.01  | 0.05   | 0.00  | 0.25   | 0.01  | 0.35   | 0.01             | 0.20   | 0.01             | 0.07   | 0.00             | 0.16   | 0.00  |        |
|                      | 19               | 0.15                                      |                    | 0.10             | 0.05 | 0.05   | 0.00   | 0.00                                                                                                                  | 0.00   | 0.00  | 0.19   | 0.02  | 0.08   | 0.01  | 0.00   | 0.00  | 0.35   | 0.02  | 0.36   | 0.02             | 0.36   | 0.02             | 0.24   | 0.00             | 0.15   | 0.01  |        |
|                      | 20               | 0.15                                      |                    | 0.05             | 0.10 | 0.10   | -0.01  | 0.00                                                                                                                  | -0.01  | 0.00  | 0.32   | 0.00  | 0.08   | 0.00  | 0.13   | 0.00  | 0.42   | 0.01  | 0.74   | 0.01             | 0.44   | 0.01             | 0.08   | 0.00             | 0.00   | 0.32  | 0.01   |
|                      | 21               | 0.15                                      |                    | 0.10             | 0.10 | 0.10   | -0.01  | 0.00                                                                                                                  | -0.01  | 0.00  | 0.22   | 0.01  | 0.10   | 0.01  | 0.04   | 0.00  | 0.40   | 0.00  | 0.49   | 0.02             | 0.41   | 0.02             | 0.14   | 0.00             | 0.00   | 0.32  | 0.01   |
|                      | 22               | 0.15                                      |                    | 0.10             | 0.05 | 0.10   | -0.01  | 0.00                                                                                                                  | -0.01  | 0.00  | 0.19   | 0.02  | 0.11   | 0.02  | 0.04   | 0.00  | 0.36   | 0.02  | 0.45   | 0.02             | 0.37   | 0.03             | 0.15   | 0.00             | 0.00   | 0.22  | 0.00   |
|                      | 23               | 0.15                                      |                    | 0.10             | 0.10 | 0.05   | 0.00   | 0.00                                                                                                                  | 0.00   | 0.00  | 0.20   | 0.02  | 0.09   | 0.01  | -0.01  | 0.01  | 0.36   | 0.03  | 0.35   | 0.03             | 0.37   | 0.03             | 0.14   | 0.00             | 0.00   | 0.23  | 0.02   |
|                      | 24               | 0.10                                      | 0.20               | 0.05             | 0.05 | 0.05   | 0.00   | 0.00                                                                                                                  | -0.01  | 0.00  | 0.15   | 0.02  | 0.06   | 0.02  | 0.05   | 0.00  | 0.33   | 0.02  | 0.33   | 0.03             | 0.24   | 0.02             | 0.07   | 0.00             | 0.00   | 0.16  | 0.01   |
|                      | 25               | 0.12                                      | 0.20               | 0.05             | 0.05 | 0.05   | 0.00   | 0.00                                                                                                                  | 0.00   | 0.00  | 0.18   | 0.02  | 0.07   | 0.01  | 0.07   | 0.01  | 0.26   | 0.02  | 0.41   | 0.02             | 0.27   | 0.02             | 0.07   | 0.00             | 0.00   | 0.19  | 0.02   |
|                      | 26               | 0.12                                      | 1.00               | 0.05             | 0.05 | 0.05   | -0.01  | 0.00                                                                                                                  | -0.01  | 0.00  | 0.16   | 0.02  | 0.04   | 0.01  | 0.05   | 0.01  | 0.25   | 0.03  | 0.35   | 0.04             | 0.25   | 0.03             | 0.07   | 0.00             | 0.00   | 0.16  | 0.02   |
|                      | 27               | 0.12                                      |                    | 0.05             | 0.05 | 0.05   | -0.01  | 0.00                                                                                                                  | -0.01  | 0.00  | 0.22   | 0.02  | 0.06   | 0.01  | 0.07   | 0.01  | 0.30   | 0.02  | 0.45   | 0.03             | 0.31   | 0.02             | 0.07   | 0.00             | 0.00   | 0.19  | 0.01   |

|                      |                  | Parameter change<br>(fraction of control) |                    |                  |      |        |        | Peak short-term response (1.5 - 3 years after change)<br>(relative difference to control as fraction of the control scenario) |        |       |        |       |        |       |        |       |        |       |        |                  |        |                  |        |                  |        |       |
|----------------------|------------------|-------------------------------------------|--------------------|------------------|------|--------|--------|-------------------------------------------------------------------------------------------------------------------------------|--------|-------|--------|-------|--------|-------|--------|-------|--------|-------|--------|------------------|--------|------------------|--------|------------------|--------|-------|
| Scena<br>rio #       | K <sub>cat</sub> | K <sub>m</sub>                            | R <sub>maint</sub> | U <sub>max</sub> | M    | Soil C |        | C/N                                                                                                                           |        | Cmic  |        | DOC   |        | CUE   |        | R     |        | G     |        | R <sub>sub</sub> |        | R <sub>mic</sub> |        | G <sub>mic</sub> |        |       |
|                      |                  |                                           |                    |                  |      | aver.  | stderr | aver.                                                                                                                         | stderr | aver. | stderr | aver. | stderr | aver. | stderr | aver. | stderr | aver. | stderr | aver.            | stderr | aver.            | stderr | aver.            | stderr | aver. |
| control              | 0                |                                           |                    |                  |      | 0.00   | 0.01   | 0.00                                                                                                                          | 0.00   | 0.00  | 0.01   | 0.00  | 0.01   | 0.00  | 0.00   | 0.00  | 0.01   | 0.00  | 0.01   | 0.00             | 0.02   | 0.00             | 0.00   | 0.00             | 0.00   | 0.00  |
| Enzyme kinetics      | 1                | 0.05                                      |                    |                  |      | -0.28  | 0.01   | -0.15                                                                                                                         | 0.01   | 0.52  | 0.01   | 0.01  | 0.00   | -0.01 | 0.00   | 0.52  | 0.01   | 0.51  | 0.01   | 1.11             | 0.04   | 0.00             | 0.00   | 0.00             | -0.01  | 0.00  |
|                      | 2                | 0.10                                      |                    |                  |      | -0.52  | 0.00   | -0.30                                                                                                                         | 0.00   | 0.57  | 0.01   | 0.05  | 0.00   | -0.03 | 0.00   | 0.57  | 0.01   | 0.50  | 0.01   | 2.47             | 0.01   | 0.00             | 0.00   | 0.00             | -0.04  | 0.00  |
|                      | 3                | 0.15                                      |                    |                  |      | -0.67  | 0.00   | -0.42                                                                                                                         | 0.00   | 0.58  | 0.01   | 0.08  | 0.00   | -0.04 | 0.00   | 0.58  | 0.01   | 0.47  | 0.01   | 3.83             | 0.03   | 0.00             | 0.00   | 0.00             | -0.07  | 0.00  |
|                      | 4                |                                           | 0.05               |                  |      | 0.00   | 0.00   | 0.00                                                                                                                          | 0.00   | 0.02  | 0.02   | -0.02 | 0.00   | 0.00  | 0.00   | 0.02  | 0.02   | 0.02  | 0.02   | 0.02             | 0.02   | 0.00             | 0.00   | 0.00             | 0.00   | 0.00  |
|                      | 5                |                                           | 0.10               |                  |      | -0.19  | 0.09   | -0.10                                                                                                                         | 0.05   | 0.34  | 0.16   | 0.00  | 0.01   | -0.01 | 0.00   | 0.34  | 0.16   | 0.32  | 0.15   | 0.73             | 0.35   | 0.00             | 0.00   | 0.00             | -0.01  | 0.01  |
|                      | 6                |                                           | 0.15               |                  |      | 0.00   | 0.00   | 0.00                                                                                                                          | 0.00   | 0.00  | 0.00   | 0.00  | 0.00   | 0.00  | 0.00   | 0.00  | 0.00   | 0.00  | 0.00   | 0.01             | -0.01  | 0.00             | 0.00   | 0.00             | 0.00   | 0.00  |
|                      | 7                |                                           | 1.00               |                  |      | 0.09   | 0.00   | 0.04                                                                                                                          | 0.00   | -0.18 | 0.01   | 0.00  | 0.00   | 0.00  | 0.00   | -0.18 | 0.01   | -0.18 | 0.01   | -0.25            | 0.01   | 0.00             | 0.00   | 0.00             | 0.00   | 0.00  |
| Microbial physiology | 8                |                                           | 0.05               |                  |      | 0.26   | 0.00   | 0.14                                                                                                                          | 0.00   | -0.74 | 0.00   | 0.45  | 0.00   | -0.08 | 0.01   | -0.71 | 0.01   | -0.75 | 0.01   | -0.77            | 0.00   | 0.10             | 0.00   | 0.00             | -0.04  | 0.01  |
|                      | 9                |                                           | 0.10               |                  |      | 0.38   | 0.00   | 0.19                                                                                                                          | 0.00   | -0.94 | 0.00   | 0.91  | 0.01   | -0.19 | 0.01   | -0.93 | 0.00   | -0.95 | 0.00   | -0.95            | 0.00   | 0.20             | 0.00   | 0.00             | -0.13  | 0.02  |
|                      | 10               |                                           | 0.15               |                  |      | 0.28   | 0.09   | 0.09                                                                                                                          | 0.07   | -0.99 | 0.00   | 0.88  | 0.16   | -0.72 | 0.06   | -0.99 | 0.00   | -0.99 | 0.00   | -0.99            | 0.00   | 0.31             | 0.00   | 0.00             | -0.34  | 0.05  |
|                      | 11               |                                           |                    | 0.05             | 0.05 | -0.14  | 0.01   | -0.09                                                                                                                         | 0.01   | 0.36  | 0.01   | 0.01  | 0.01   | 0.03  | 0.00   | 0.36  | 0.01   | 0.43  | 0.01   | 0.58             | 0.03   | 0.00             | 0.00   | 0.00             | 0.05   | 0.00  |
|                      | 12               |                                           |                    | 0.10             | 0.10 | -0.24  | 0.01   | -0.16                                                                                                                         | 0.00   | 0.56  | 0.01   | 0.05  | 0.00   | 0.06  | 0.00   | 0.56  | 0.01   | 0.71  | 0.01   | 1.07             | 0.03   | 0.00             | 0.00   | 0.00             | 0.09   | 0.00  |
|                      | 13               |                                           |                    | 0.15             | 0.15 | -0.36  | 0.00   | -0.25                                                                                                                         | 0.00   | 0.72  | 0.02   | 0.05  | 0.01   | 0.08  | 0.00   | 0.72  | 0.02   | 0.95  | 0.02   | 1.38             | 0.04   | 0.00             | 0.00   | 0.00             | 0.13   | 0.00  |
|                      | 14               | 0.10                                      |                    | 0.05             |      |        | -0.20  | 0.01                                                                                                                          | -0.06  | 0.00  | 0.17   | 0.00  | 0.09   | 0.00  | -0.07  | 0.00  | 0.29   | 0.00  | 0.16   | 0.00             | 0.52   | 0.02             | 0.10   | 0.00             | 0.00   | -0.01 |
| Mixed Scenarios      | 15               | 0.15                                      |                    | 0.10             |      | -0.08  | 0.00   | 0.03                                                                                                                          | 0.00   | -0.23 | 0.01   | 0.23  | 0.01   | -0.12 | 0.00   | -0.08 | 0.01   | -0.2  |        |                  |        |                  |        |                  |        |       |

|                                               | Warming effect |      |          |
|-----------------------------------------------|----------------|------|----------|
|                                               | LR             | d.f. | <i>P</i> |
| <u>Long-term field warming</u>                |                |      |          |
| Soil C                                        | 15.84          | 1,8  | 0.0001   |
| Microbial biomass ( $C_{mic}$ )               | 8.40           | 1,8  | 0.0038   |
| Total microbial respiration (R)               | 0.84           | 1,8  | 0.3603   |
| Total microbial growth (G)                    | 0.21           | 1,4  | 0.6479   |
| Total microbial uptake (U)                    | 1.16           | 1,8  | 0.2822   |
| Microbial carbon use efficiency (CUE)         | 0.70           | 1,4  | 0.4028   |
| Microbial turnover rate ( $T_m$ )             | 8.64           | 1,4  | 0.0033   |
| Mass-specific microbial respiration ( $R_m$ ) | 6.37           | 1,4  | 0.0116   |
| Mass-specific microbial growth ( $G_m$ )      | 8.64           | 1,8  | 0.0033   |
| Mass-specific microbial uptake ( $U_m$ )      | 7.71           | 1,4  | 0.0055   |
| <u>Laboratory warming (short-term)</u>        |                |      |          |
| Total microbial respiration (R)               | 7.82           | 2,5  | 0.0200   |
| Total microbial growth (G)                    | 10.74          | 2,5  | 0.0046   |
| Total microbial uptake (U)                    | 9.26           | 2,5  | 0.0097   |
| Microbial turnover rate ( $T_m$ )             | 8.23           | 2,5  | 0.0163   |
| Mass-specific microbial respiration ( $R_m$ ) | 8.36           | 2,5  | 0.0153   |
| Mass-specific microbial growth ( $G_m$ )      | 8.23           | 2,5  | 0.0163   |
| Mass-specific microbial uptake ( $U_m$ )      | 9.21           | 2,5  | 0.0100   |
| <u>Laboratory incubation (long-term)</u>      |                |      |          |
| Total microbial respiration (R)               | 1.63           | 2,5  | 0.4441   |
| Total microbial growth (G)                    | 0.90           | 2,5  | 0.6366   |
| Total microbial uptake (U)                    | 2.98           | 2,5  | 0.2249   |

- 120 1. German, D. P., Marcelo, K. R. B., Stone, M. M. & Allison, S. D. The Michaelis-Menten  
121 kinetics of soil extracellular enzymes in response to temperature: A cross-latitudinal study.  
122 *Global Change Biology* **18**, 1468–1479 (2012).
- 123 2. Blagodatskaya, E., Blagodatsky, S., Khomyakov, N., Myachina, O. & Kuzyakov, Y.  
124 Temperature sensitivity and enzymatic mechanisms of soil organic matter decomposition  
125 along an altitudinal gradient on Mount Kilimanjaro. *Ecology Letters* **6**, 22240 (2016).
- 126 3. Van Bodegom, P. Microbial maintenance: A critical review on its quantification. *Microbial*  
127 *Ecology* **53**, 513–523 (2007).
- 128 4. Rutz, B. A. & Kieft, T. L. Phylogenetic characterization of dwarf archaea and bacteria from a.  
129 *Soil Biology and Biochemistry* **36**, 825–833 (2004).
- 130 5. Clode, P. L. *et al.* In situ mapping of nutrient uptake in the rhizosphere using nanoscale  
131 secondary ion mass spectrometry. *Plant physiology* **151**, 1751–1757 (2009).
- 132 6. Bryan, A. K., Goranov, A., Amon, A. & Manalis, S. R. Measurement of mass, density, and  
133 volume during the cell cycle of yeast. *Proc Natl Acad Sci U S A* **107**, 999–1004 (2010).
- 134 7. Romanova, N. D. & Sazhin, A. F. Relationships between the cell volume and the carbon  
135 content of bacteria. *Oceanology* **50**, 522–530 (2010).
- 136 8. Kirchman, D. L. *Processes in Microbial Ecology*. (Oxford University Press, 2012).
- 137 9. Kaiser, C., Franklin, O., Dieckmann, U. & Richter, A. Microbial community dynamics  
138 alleviate stoichiometric constraints during litter decay. *Ecology Letters* **17**, 680–690 (2014).
- 139 10. Tinker, P. & Nye, P. *Solute Movement in the Rhizosphere*. (Oxford: Oxford University Press,  
140 2000).
- 141 11. Evans, S., Dieckmann, U., Franklin, O. & Kaiser, C. Synergistic effects of diffusion and  
142 microbial physiology reproduce the Birch effect in a micro-scale model. *Soil Biology and*  
143 *Biochemistry* **93**, 28–37 (2016).
